# Supplementary material
Source: Springer Nature journal article supplement (https://www.springermedizin.de/resource/supplementary/13041_2010_85_MOESM4_ESM.pdf/25657488)

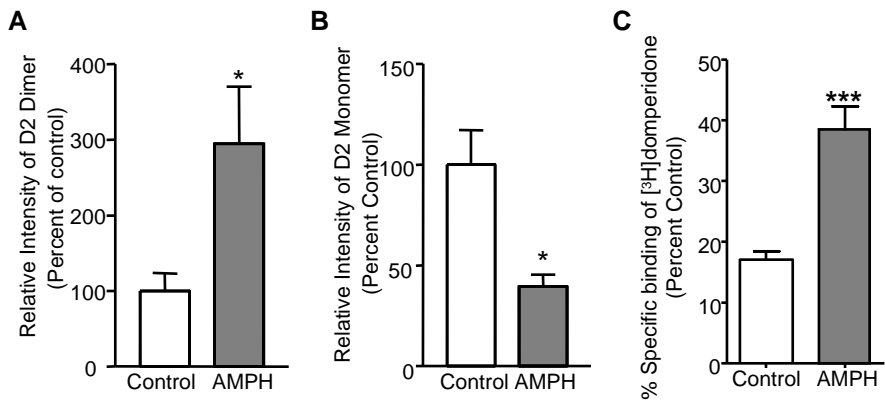

**D**

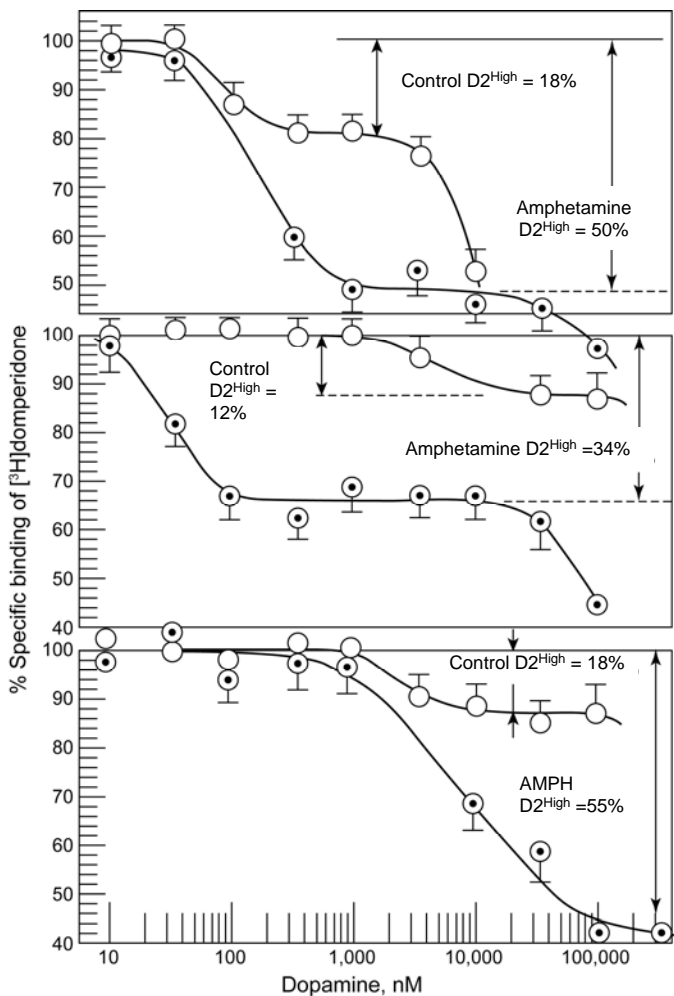

Supplement: MOESM4 [file 25657488]
